# Supplementary material for: A Principal Component Analysis of 39 Scientific Impact Measures
Source: PubMed Central journal article supplement (PMC2699100; doi:10.1371/journal.pone.0006022), 2009-06-29
Supplement: pone.0006022.s001.pdf [file pone.0006022.s001.pdf]

## Appendix S1

### Measure definitions

Let  $D = (V, E)$  be a directed graph with the set of nodes  $V$  and the set of oriented edges  $E$ . Assume the edges  $e = (u, v)$  have weights  $w(u, v) > 0$ ,  $(u, v) \in E$  and  $w(u, v) = 0$  for  $(u, v) \notin E$ . For unweighted graphs  $w(u, v) = 1$ ,  $e(u, v) \in E$ .

A undirected graph  $G = (V, E)$  can be constructed from  $D$  by replacing every oriented edge  $(u, v)$  by an undirected edge  $(u, v)$  with weight  $\hat{w}(u, v) = [w(u, v) + w(v, u)]/2$ . For unweighted graphs this amounts to replacing each directed link by an undirected link.

We use the following definitions of network measures:

### Degree Centrality

The degree centrality of a node  $u$  is defined as the sum of weights of edges incident to  $u$

$$C_D(u) = \sum_{(u,v) \in E} w(u, v). \quad (1)$$

For directed graphs there is an indegree

$$C_{D_{in}}(u) = \sum_{(v,u) \in E} w(v, u), \quad (2)$$

and outdegree

$$C_{D_{out}}(u) = \sum_{(u,v) \in E} w(u, v). \quad (3)$$

### Closeness Centrality

Let  $d_G(s, t)$  be the shortest distance between nodes  $s$  and  $t$  in  $G$  (the sum of path weight is minimum).

The closeness centrality [1] of a node  $u$  is

$$C_C(u) = \frac{1}{\sum_{t \in V} d_G(u, t)}. \quad (4)$$

We use the algorithm from Ref. [2].

### Betweenness Centrality

Let  $\sigma_{st}$  be the number of weighted shortest paths between nodes  $s$  and  $t$  in the graph and  $\sigma_{st}(u)$  be the number of those shortest paths that pass through node  $u$ . The betweenness centrality [3] is

$$C_B(u) = \sum_{s \neq u \neq t \in V} \frac{\sigma_{st}(u)}{\sigma_{st}}. \quad (5)$$

We use the algorithm from Ref. [2].

### PageRank

The PageRank [4] of node  $v$  is

$$PR(u) = (1 - d) + d \sum_{(v,u) \in E} w(v, u) \frac{PR(v)}{C_{D_{out}}(v)}. \quad (6)$$

See the review [5] for implementation details.

## Measure definitions

For a directed graph  $D = (V, E)$  with weights  $w(u, v)$

### Directed weighted

- Directed Weighted In-degree Centrality: Eq. (2)
- Directed Weighted Out-degree Centrality: Eq. (3)
- Directed Weighted Pagerank: Eq. (6)

### Directed Unweighted

With  $w(u, v) = 1$  for  $(u, v) \in E$ .

- Directed Unweighted In-degree Centrality: Eq. (2)
- Directed Unweighted Out-degree Centrality: Eq. (3)
- Directed Unweighted Pagerank: Eq. (6)

### Undirected weighted

Replacing every oriented edge  $(u, v) \in E$  by an undirected edge  $(u, v)$  with weight  $\hat{w}(u, v) = [w(u, v) + w(v, u)]/2$ .

- Undirected Weighted LCC\* Betweenness: Eq. (5)
- Undirected Weighted LCC Closeness: Eq. (4)
- Undirected Weighted LCC Out-Degree Centrality: Eq. (1)
- Undirected Weighted LCC Pagerank: Eq. (6)

★: Largest Connected Component

### Undirected unweighted

Replacing every oriented edge  $(u, v) \in E$  by an undirected edge  $(u, v)$  with weight  $\hat{w}(u, v) = 1$ .

- Undirected Unweighted LCC Betweenness: Eq. (5)
- Undirected Unweighted LCC Closeness: Eq. (4)
- Undirected Unweighted LCC Out-degree Centrality: Eq. (1)
- Undirected Unweighted LCC Pagerank: Eq. (6)

## References

1. Sabidussi G (1966) The centrality index of a graph. *Psychometrika* 31: 581–603.
2. Brandes U (2001) A faster algorithm for betweenness centrality. *Journal of Mathematical Sociology* 25: 163–177.
3. Freeman LC (1977) Set of measures of centrality based on betweenness. *Sociometry* 40: 35 – 41.
4. Brin S, Page L, Motwami R, Winograd T (1999) The PageRank citation ranking: bringing order to the Web. Technical Report 1999-0120, Stanford University.
5. Langville AN, Meyer CD (2005) A survey of eigenvector methods for web information retrieval. *SIAM Review* 47: 135–161.
